# Supplementary material for: Ce6-C6-TPZ co-loaded albumin nanoparticles for synergistic combined PDT-chemotherapy of cancer
Source: Royal Society of Chemistry journal article supplement (doi:10.1039/c9tb01346f), 2019-01-01
Supplement: c9tb01346f1.pdf [file c9tb01346f1.pdf]

## Supporting Information

### **Ce6-C6-TPZ Co-loaded Albumin Nanoparticles for Synergistic Combined PDT-Chemo Therapy of Cancer**

*Xueke Sun<sup>a</sup>, Jiao Sun<sup>b</sup>, Jiekai Lv<sup>a</sup>, Biao Dong<sup>a\*</sup>, Min Liu<sup>c</sup>, Jingshi Liu<sup>d</sup>, Liheng Sun<sup>a</sup>,  
Guangji Zhang<sup>e</sup>, Li Zhang<sup>a</sup>, Gaosheng Huang<sup>a</sup>, Wen Xu<sup>a</sup>, Lin Xu<sup>a</sup>, Xue Bai<sup>a</sup>, Hongwei  
Song<sup>a\*</sup>*

#### **AUTHOR ADDRESS**

- a. State Key Laboratory on Integrated Optoelectronics, College of Electronic Science and Engineering, Jilin University, 2699 Qianjin Street, Changchun, 130012, P. R. China.
- b. Department of Cell Biology, College of Basic Medical Sciences, Jilin University, Changchun, Jilin, 130021, P.R. China
- c. Department of Radiation Oncology, The First Hospital, Jilin University, 71 Xinmin Street, Changchun, 130021, China
- d. Jilin University College of Physics, Jilin University, 2699 Qianjin Street, Changchun, 130012, P. R. China.
- e. Key Laboratory for Molecular Enzymology and Engineering of Ministry of Education, College of Life Science, Jilin University, 2699 Qianjin Street, Changchun, 130012, P.R. China.

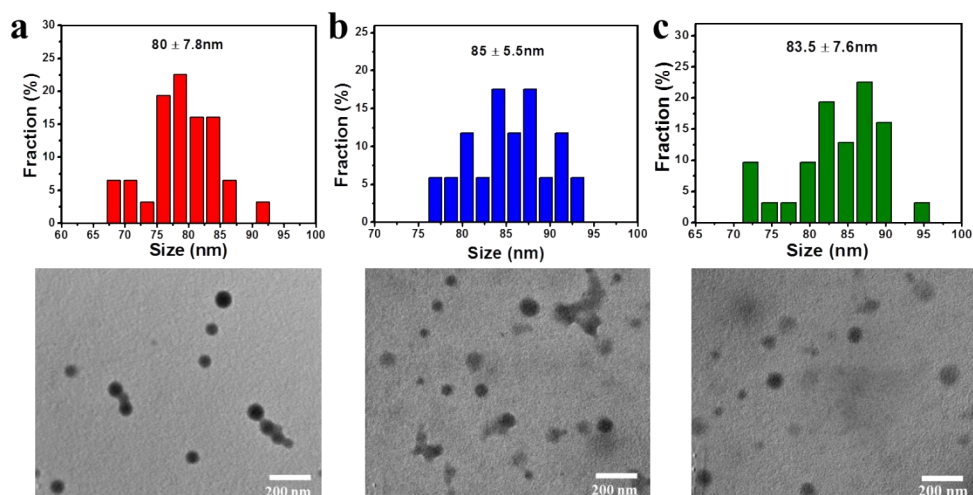

**Figure S1** Particle size distribution of different nanomaterials, (a) BSA-Ce6-C6-TPZ, (b) BSA-Ce6-C6, (c) BSA-C6-TPZ. The TEM images of BSA-Ce6-C6-TPZ, BSA-Ce6-C6 and BSA-C6-TPZ.

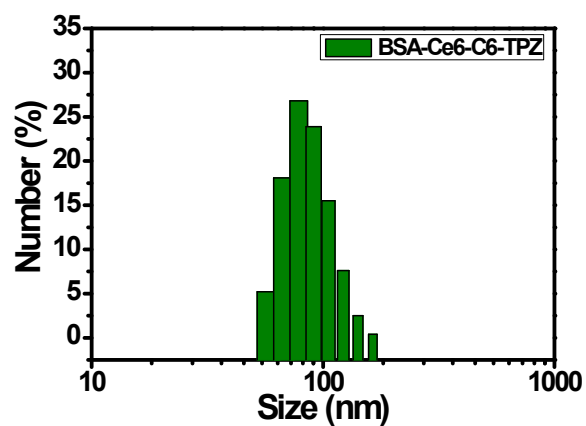

**Figure S2** The DLS data of BSA-Ce6-C6-TPZ.

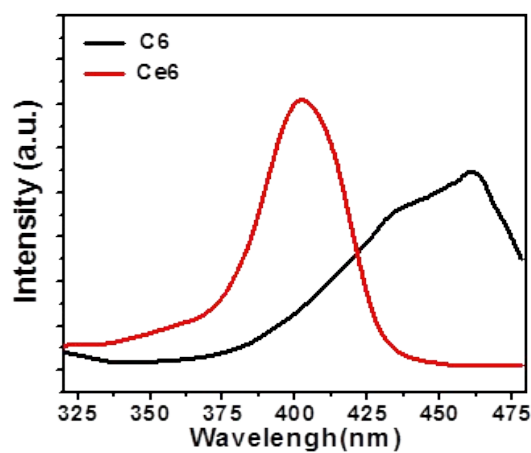

**Figure S3** Fluorescence excitation spectra of C6 ( $\lambda_{em}=500$  nm) and Ce6 ( $\lambda_{em}=668$  nm).

The TEM images of BSA-Ce6-C6-TPZ, BSA-Ce6-C6 and BSA-C6-TPZ were shown in **Figure. S1**, and the average particle size were  $80 \pm 7.8$  nm for BSA-Ce6-C6-TPZ,  $85 \pm 5.5$  nm for the BSA-Ce6-C6 size, and  $83.5 \pm 7.6$  nm for the BSA-C6-TPZ. The monodispersity and solubility of BSA-Ce6-C6-TPZ can be confirmed by the DLS showed in Figure. S2. From the excitation spectra monitoring the emission of 500 nm and 668 nm, respectively, the main excitation band of C6 molecules is very wide from 370 nm to 475 nm, and that of Ce6 molecules start from 350 nm to 450 nm. Therefore, 405 nm and 450 can both co-excited the molecules in the albumin composites. According to the same excitation wavelength, the fluorescence branching ratio of C6 molecule and Ce6 molecule can be further used as a monitoring indicator of PDT as shown in **Figure. S3**.
